# Supplementary material for: Biophysical restriction of growth area using a monodispersed gold sphere nanobarrier prolongs the mitotic phase in HeLa cells
Source: Royal Society of Chemistry journal article supplement (doi:10.1039/c9ra08410j), 2019-01-01
Supplement: c9ra08410j2.pdf [file c9ra08410j2.pdf]

## Supplementary Information

### **Biophysical restriction of growth area using a monodispersed gold sphere nanobarrier prolongs mitotic phase in HeLa cells**

Dae-Woong Jung<sup>a,d,#</sup>, Hyun-Joo Ro<sup>a,b,c,#</sup>, Junmin Kim<sup>a,d</sup>, Seung Il Kim<sup>a,b,c</sup>, Gi-Ra Yi<sup>d</sup>, Gaehang Lee<sup>a,\*</sup>, and Sangmi Jun<sup>a,b,c,\*</sup>

<sup>a</sup> Korea Basic Science Institute, Daejeon, 34133, Republic of Korea

<sup>b</sup> Convergent Research Center for Emerging Virus Infection, Korea Research Institute of Chemical Technology, Daejeon, 34114, Republic of Korea

<sup>c</sup> Bio-Analytical Science, University of Science & Technology, Daejeon, 34113, Republic of Korea

<sup>d</sup> Department of Chemical Engineering, Sungkyunkwan University, Suwon, 16419, Republic of Korea

---

<sup>#</sup> Equal contribution.

<sup>\*</sup> Corresponding authors. Korea Basic Science Institute, Daejeon, 34133, Republic of Korea.  
E-mail: ghlee@kbsi.re.kr (G. Lee), smjun@kbsi.re.kr (S. Jun)

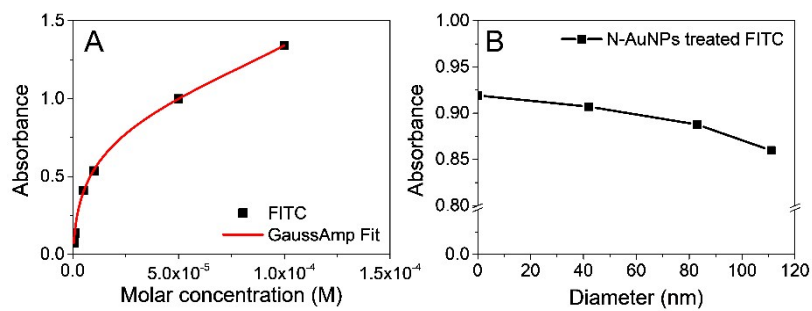

**Fig. S1** (A) Standard calibration curve of the absorbance of FITC solution and (B) the absorbance of 42-, 83-, and 111-nm N-AuNPs-treated FITC solutions at 456 nm.

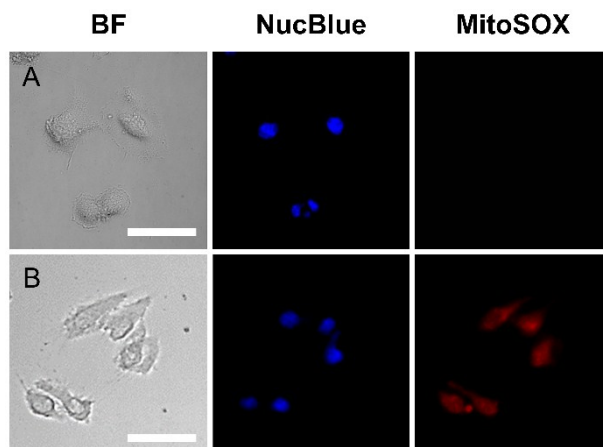

**Fig. S2** Fluorescence micrographs of (A) HeLa cells (untreated control) and (B) mitochondrial ROS-positive HeLa cells stained with TBHP (positive control). Scale bar, 50  $\mu$ m.

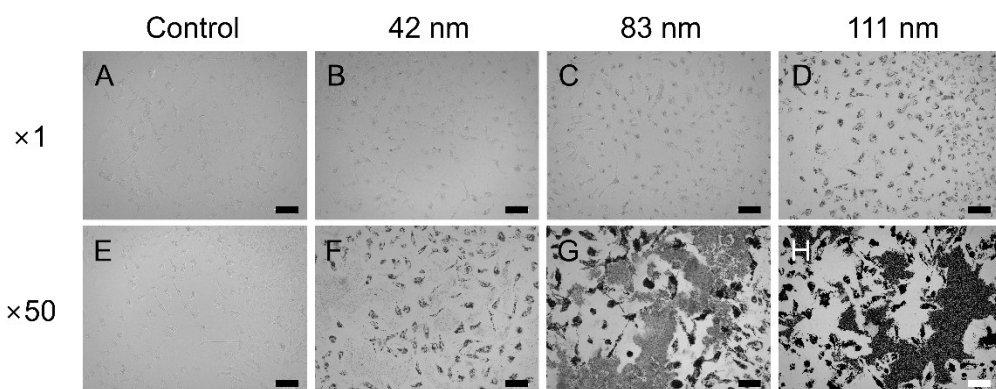

**Fig. S3.** Bright-field optical microscopy images of (A, E) HeLa cells (untreated control) and cells exposed to (B, F) 42-, (C, G) 83-, and (D, H) 111-nm N-AuNSs at concentrations of (A-D)  $\times 1$  and (E-H)  $\times 50$  for 24 h. Cellular uptake of N-AuNSs was confirmed by bright-field imaging. Scale bar, 100  $\mu\text{m}$ .

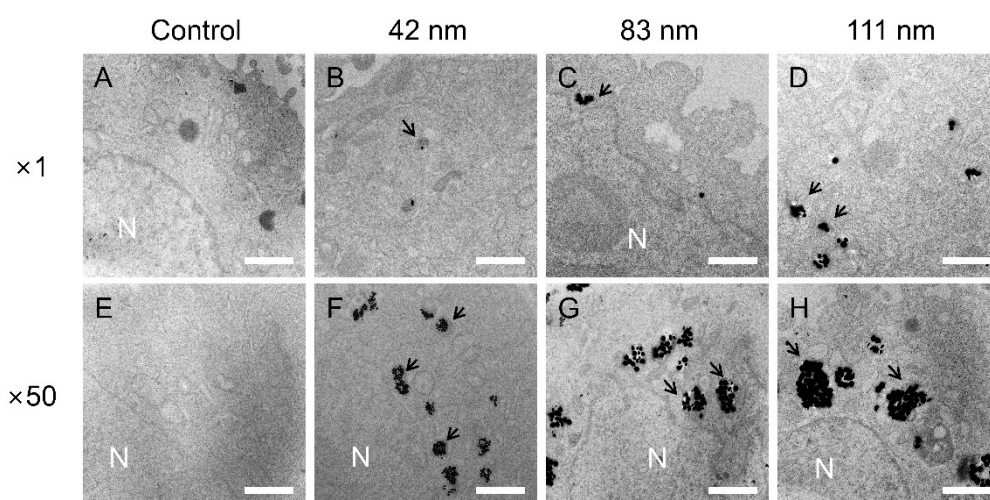

**Fig. S4.** TEM images showing cellular uptake and intracellular localization of (A, E) control untreated, (B, F) 42-, (C, G) 83-, and (D, H) 111-nm N-AuNSs. After 24 h of exposure, internalization was observed at concentrations of both (A-D)  $\times 1$  and (E-H)  $\times 50$ . Intracellular N-AuNSs are trapped inside endosomes (arrows) and distributed in the cytoplasm. Scale bar, 1  $\mu\text{m}$ . N, nuclei.

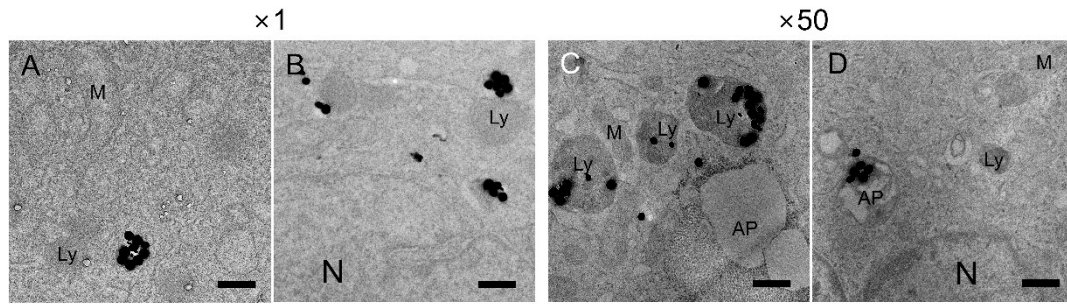

**Fig. S5** TEM images of HeLa cells incubated with 111-nm N-AuNSs at concentrations of (A-B)  $\times 1$  and (C-D)  $\times 50$ . Severe mitochondrial damage was not observed, but increased autophagosomes and enlarged lysosomes are observed. Scale bar, 500 nm. AP=autophagosome, Ly=lysosome, M=mitochondria, N=nucleus.

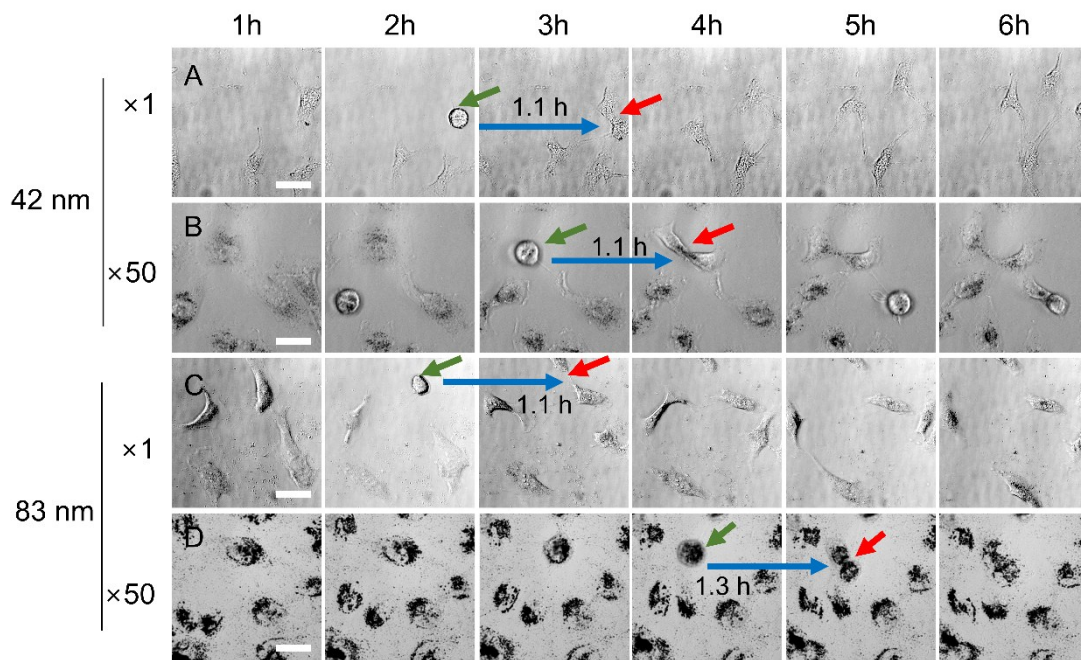

**Fig. S6** Time-lapse snapshots of HeLa cells cultured in 4-chamber dishes and exposed to (A-B) 42-nm and (C-D) 83-nm N-AuNSs at concentrations of  $\times 1$  and  $\times 50$ . These six snapshots, taken at 1 h intervals, were extracted from Video S6 (42 nm N-AuNS,  $\times 1$ ), S7 (42 nm N-AuNS,  $\times 50$ ), S8 (83 nm N-AuNS,  $\times 1$ ), and S9 (83 nm N-AuNS,  $\times 50$ ) over a total duration of 24 h.

Green arrows indicate the start point of metaphase and red arrows indicate the end point of telophase. Blue arrows indicate M-phase durations. Scale bar, 50  $\mu\text{m}$ .

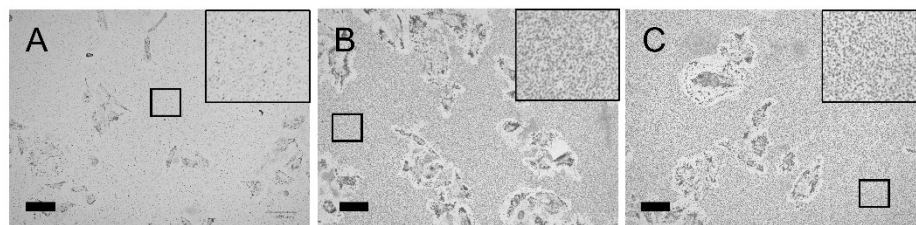

**Fig. S7** Bright-field optical microscopy images of HeLa cells exposed to (A-B) 83-nm N-AuNSs at concentration of  $\times 50$  in (A) 4-chamber dishes and (B) 96-well plates, and (C) 42-nm N-AuNSs at  $\times 200$  in 96-well plates for 1 h. Scale bar, 100  $\mu\text{m}$ . The insets in A-C show an enlarged image of the square areas.

**Table S1** Numbers of  $\text{NH}_2$ -PEG molecules on 83- and 111-nm AuNS surfaces from UV-Vis absorbance of N-AuNSs-treated FITC solution (standard curve shown in Fig. S1).

| Diameter (nm) | Number of AuNSs   | Absorbance (456 nm) | $\text{NH}_2$ -PEG /AuNS | Footprint ( $\text{nm}^2$ ) | Number of $\text{NH}_2$ -PEG at $\times 1$ | Number of $\text{NH}_2$ -PEG at $\times 50$ |
|---------------|-------------------|---------------------|--------------------------|-----------------------------|--------------------------------------------|---------------------------------------------|
| 83            | $4.2 \times 10^9$ | 0.88                | $2.6 \times 10^4$        | 1.2                         | $1.1 \times 10^{13}$                       | $4.6 \times 10^{21}$                        |
| 111           | $4.2 \times 10^9$ | 0.86                | $4.7 \times 10^4$        | 1.2                         | $2.0 \times 10^{13}$                       | $8.3 \times 10^{21}$                        |

**Table S2** Concentrations of N-AuNSs.

| Name                   | $\times 1$        | $\times 50$       | $\times 100$      | $\times 200$      |
|------------------------|-------------------|-------------------|-------------------|-------------------|
| Concentration (NSs/mL) | $4.2 \times 10^7$ | $2.1 \times 10^9$ | $4.2 \times 10^9$ | $8.4 \times 10^9$ |

**Table S3** Numerical values of cell proliferation rates in HeLa cells after a 24 h exposure to 42, 83, and 111 nm N-AuNSs at concentration of  $\times 1$ ,  $\times 50$ ,  $\times 100$ , and  $\times 200$ , corresponding to Fig. 3.

| Concentration | Control | 42 nm | 83 nm | 111 nm |
|---------------|---------|-------|-------|--------|
| $\times 1$    | 100     | 104   | 102   | 83     |
| $\times 50$   | 100     | 105   | 73    | 35     |
| $\times 100$  | 100     | 101   | 73    | 28     |
| $\times 200$  | 100     | 102   | 79    | 18     |

**Video S1** Time-lapse live-cell imaging of HeLa cells cultured on fibronectin coated 96-well plates and incubated without N-AuNSs for 24 h

**Video S2** Time-lapse live-cell imaging of HeLa cells cultured on fibronectin coated 96-well plates and incubated with 42-nm N-AuNSs at concentration of  $\times 50$  for 24 h.

**Video S3** Time-lapse live-cell imaging of HeLa cells cultured on fibronectin coated 96-well plates and incubated with 83-nm N-AuNSs at concentration of  $\times 50$  for 24 h.

**Video S4** Time-lapse live-cell imaging of HeLa cells cultured on fibronectin coated 96-well plates and incubated with 111-nm N-AuNSs at concentration of  $\times 50$  for 24h.

**Video S5** Time-lapse live-cell imaging of apoptotic HeLa cells exposed to 111-nm N-AuNSs

**Video S6** Time-lapse live-cell imaging of HeLa cells cultured on fibronectin coated 4-chamber dish and incubated with 42-nm N-AuNSs at concentration of  $\times 1$  for 24 h.

**Video S7** Time-lapse live-cell imaging of HeLa cells cultured on fibronectin coated 4-chamber dish and incubated with 42-nm N-AuNSs at concentration of  $\times 50$  for 24 h.

**Video S8** Time-lapse live-cell imaging of HeLa cells cultured on fibronectin coated 4-chamber dish and incubated with 83-nm N-AuNSs at concentration of  $\times 1$  for 24 h.

**Video S9** Time-lapse live-cell imaging of HeLa cells cultured on fibronectin coated 4-chamber dish and incubated with 83-nm N-AuNSs at concentration of  $\times 50$  for 24 h.
